# Supplementary material
Source: Springer Nature journal article supplement (https://www.springermedizin.de/resource/supplementary/12876_2012_705_MOESM1_ESM.pdf/9437632)
Supplement: MOESM1 [file 9437632]

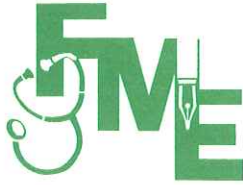

錫安國際會議顧問股份有限公司

FORMOSA MEDICAL EDITORS

編譯部

Tel: +886-2-2586-6717 Fax: +886-2-2596-8569

E-mail: fme@mail.tcm-mice.com.tw

www.tcm-mice.com.tw

## Certification of Editorial Services

2012/02/29

No. FMP12-0222-46

This document certifies that the paper entitled **Correction of Intravenous Non-high-dose Pantoprazole is Equally Effective as High-dose Pantoprazole in Preventing Rebleeding among Low Risk Patients with a Bleeding Peptic Ulcer after Initial Endoscopic Hemostasis** by Chih-Ming Liang, M.D.\*; Jyong-Hong Lee, M.D.\*; Yuan-Hung Kuo, M.D.; Keng-Liang Wu, M.D.; Yi-Chun Chiu, M.D.; Yeh-Pin Chou, M.D.; Ming-Luen Hu, M.D.; Wei-Chen Tai, M.D.; King-Wah Chiu, M.D.; Tsung-Hui Hu, M.D.,PhD and Seng-Kee Chuah, M.D. was edited by Formosa Medical Editors on February 29, 2012.

Sincerely,

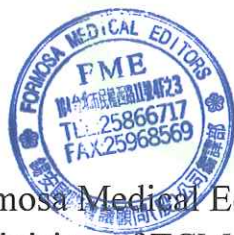

Formosa Medical Editors  
A Division of TCM
